# Supplementary material for: Towards the rational design of novel drugs based on solubility, partitioning/distribution, biomimetic permeability and biological activity exemplified by 1,2,4-thiadiazole derivatives
Source: Royal Society of Chemistry journal article supplement (doi:10.1039/c6md00545d), 2016-10-28
Supplement: c6md00545d1.pdf [file c6md00545d1.pdf]

## Supporting Information

### **Towards the Rational Design of Novel Drugs based on Solubility, Partitioning/Distribution, Biomimetic Permeability and Biological Activity exemplified by 1,2,4-Thiadiazole Derivatives**

Tatyana V. Volkova<sup>a</sup>, Irina V. Terekhova<sup>a</sup>, Oleg I. Silyukov<sup>a</sup>, Alexey N. Proshin<sup>b</sup>, Annette Bauer-Brandl<sup>c</sup>, German L. Perlovich<sup>a,\*</sup>

<sup>a</sup>Institute of Solution Chemistry, Russian Academy of Sciences, 153045 Ivanovo, Russia

<sup>b</sup>Institute of Physiologically Active Compounds, Russian Academy of Sciences, 142432 Chernogolovka, Russia

<sup>c</sup>Department of Physics, Chemistry and Pharmacy, University of Southern Denmark, 5230 Odense M, Denmark

\*Tel: +7 4932 533784; Fax: +7 4932 336237;

E-mail: [glp@isc-ras.ru](mailto:glp@isc-ras.ru).

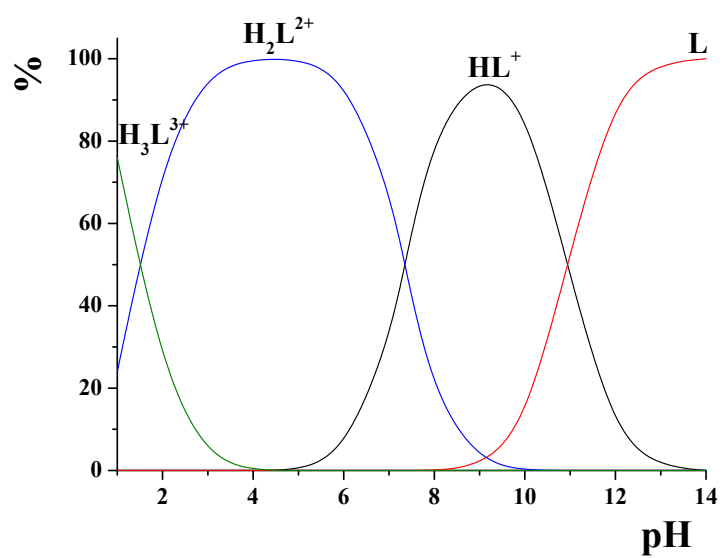

**Fig. 1SI.** Dependence of content of the ionized forms of the molecules on the pH of buffer solution of compound **2**.

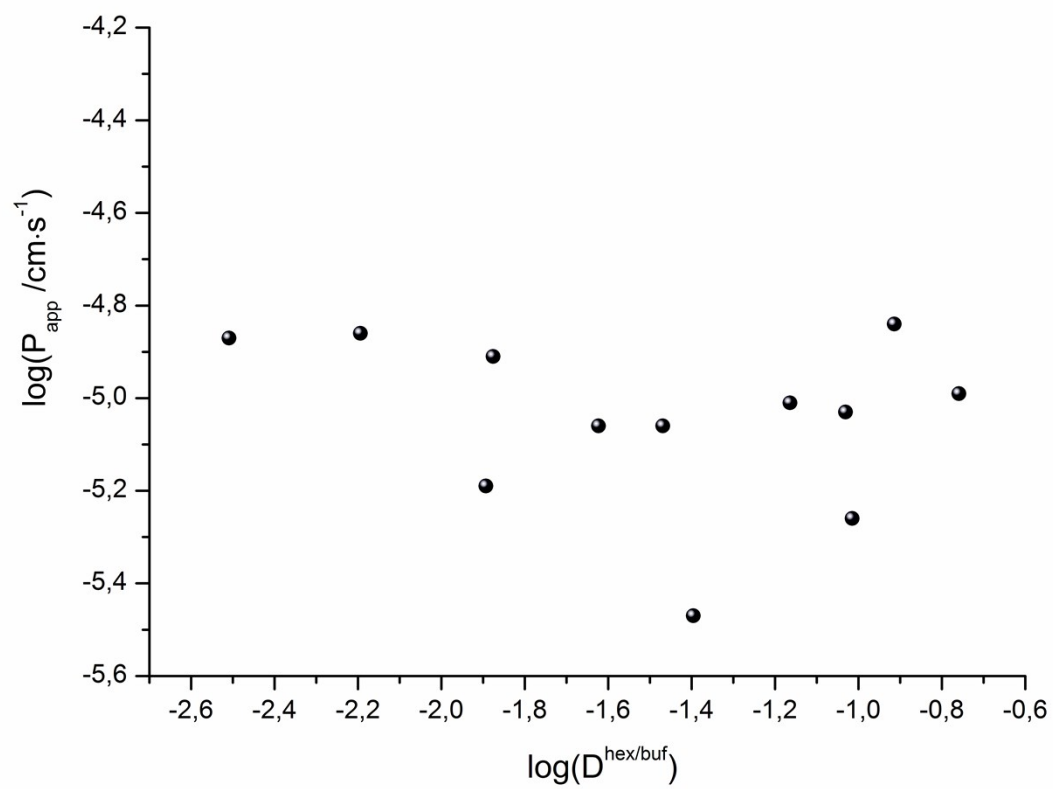

a

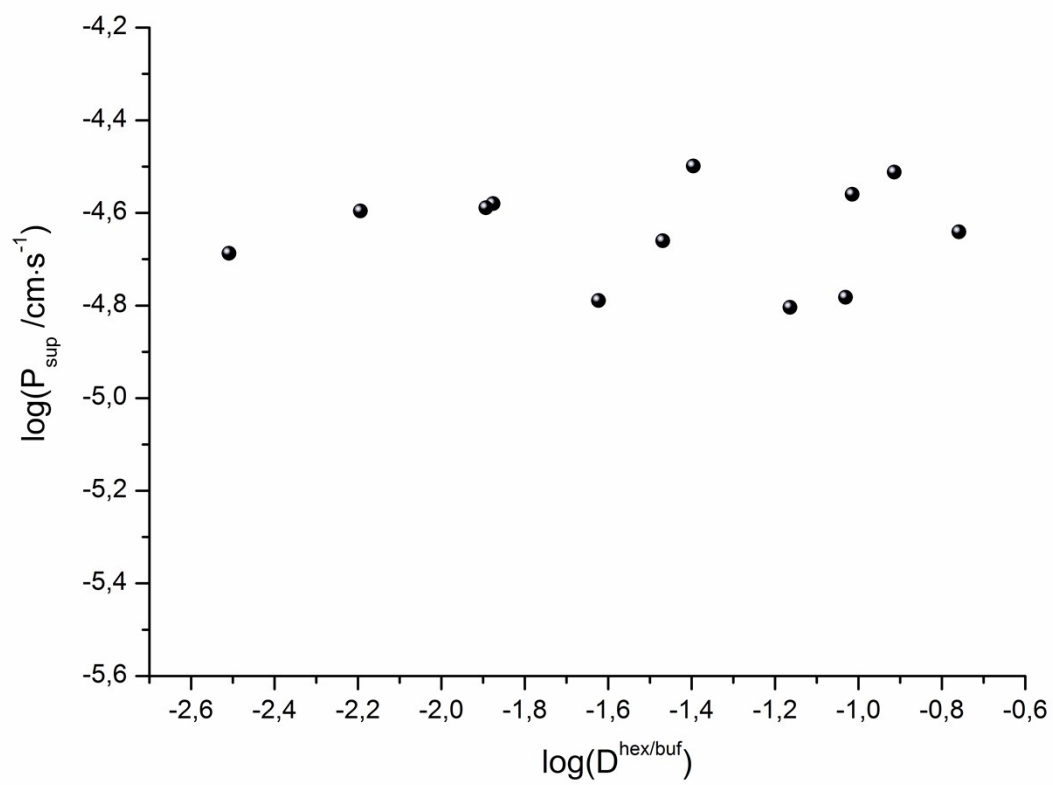

b

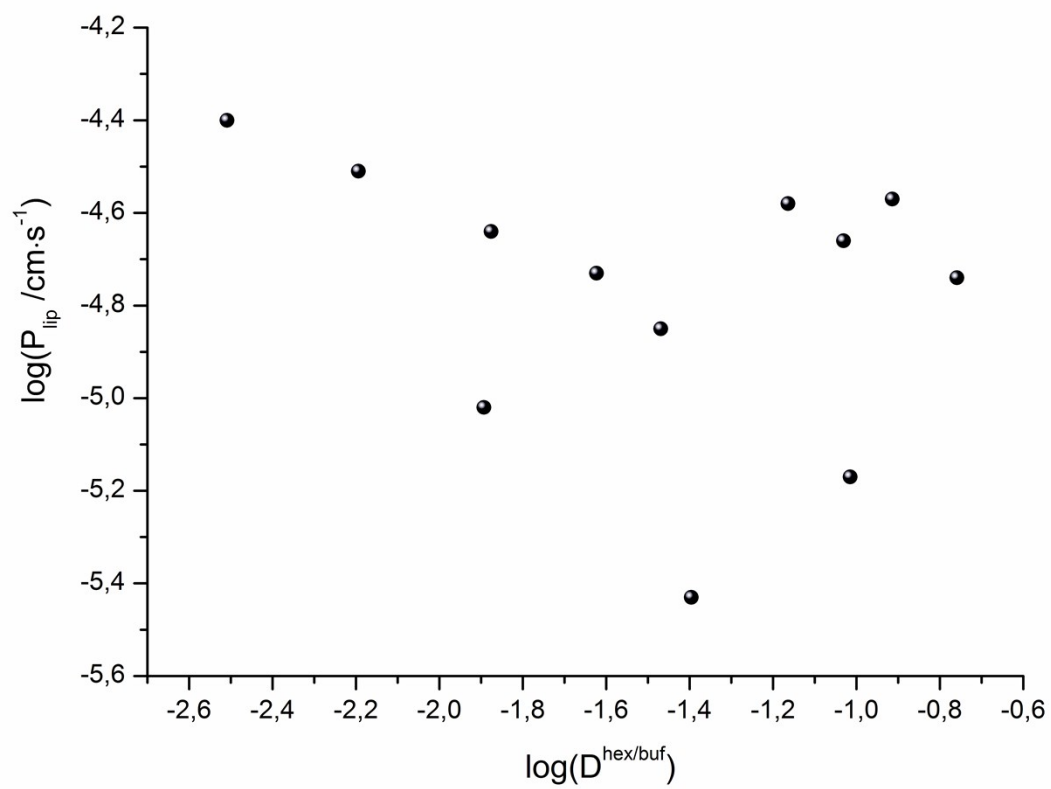

c

**Fig. 2SI.** Relationships  $\log P_{app}$ ,  $\log P_{sup}$ ,  $\log P_{lip}$  with  $\log D^{hex/buf}$

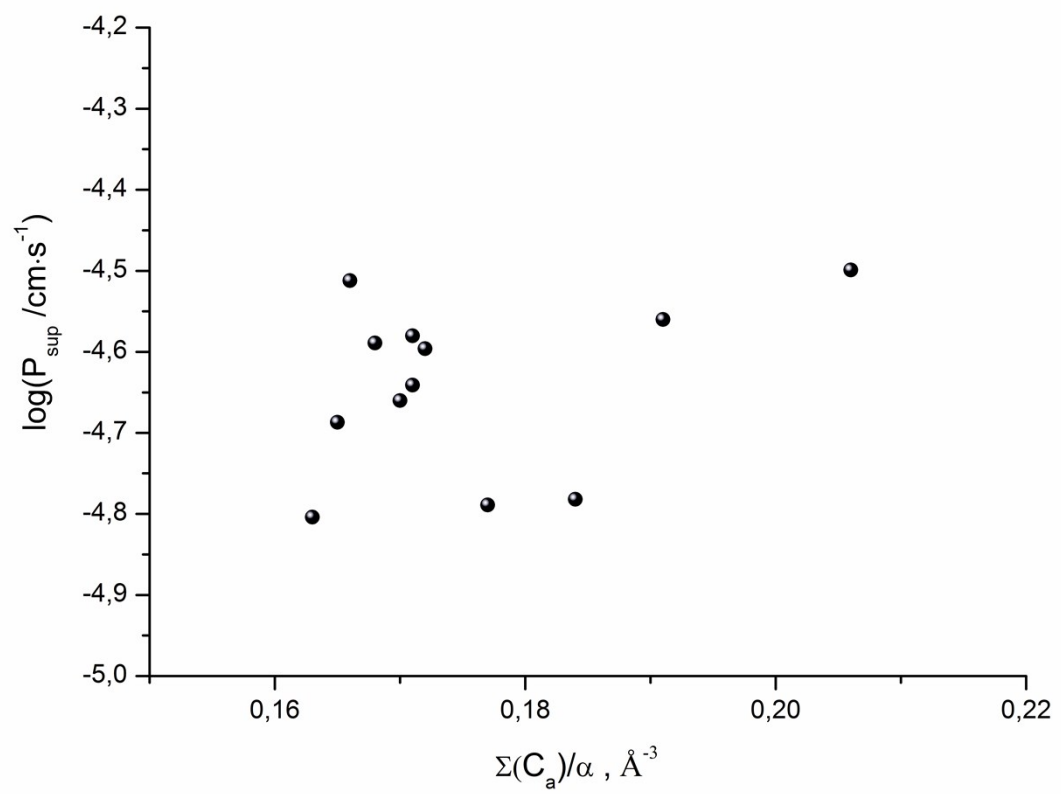

**Fig. 3SI.** Relationship  $\log P_{\text{sup}}$  with  $\Sigma(C_a)/\alpha$
